# Supplementary material for: Cytomegalovirus reactivation after CD19 CAR T-cell therapy is clinically significant
Source: PubMed Central journal article supplement — Haematologica. 2022 Oct 20;108(2):615–20. doi: 10.3324/haematol.2022.281719 (PMC9890024; doi:10.3324/haematol.2022.281719), 2022-10-20
Supplement: 2022_281719_CHEN_SUPPL.pdf [file 2022_281719_CHEN_SUPPL.pdf]

# Cytomegalovirus reactivation after CD19 CAR T-cell therapy is clinically significant

George Chen,<sup>1</sup> Megan Herr,<sup>1</sup> Jan Nowak,<sup>2</sup> Christine Ho,<sup>1</sup> Nikolaos Almyroudis,<sup>3</sup> Kristopher Attwood,<sup>4</sup> John Bonnewell,<sup>3</sup> Marissa Walsh,<sup>3</sup> Brahm Segal,<sup>3</sup> Maureen Ross,<sup>1</sup> Philip McCarthy<sup>1#</sup> and Theresa Hahn<sup>5#</sup>

<sup>1</sup>Department of Medicine, Transplant and Cellular Therapy Program, Roswell Park Comprehensive Cancer Center; <sup>2</sup>Department of Pathology, Roswell Park Comprehensive Cancer Center; <sup>3</sup>Department of Internal Medicine, Division of Infectious Diseases, Roswell Park Comprehensive Cancer Center; <sup>4</sup>Department of Biostatistics, Roswell Park Comprehensive Cancer Center and <sup>5</sup>Department of Cancer Prevention & Control, Roswell Park Comprehensive Cancer Center, Buffalo, NY, USA

*#PM and TH contributed equally as co-senior authors.*

Correspondence:

G. CHEN - [George.chen@roswellpark.org](mailto:George.chen@roswellpark.org)

<https://doi.org/10.3324/haematol.2022.281719>

## Supplemental Materials

| <b>Supplemental Table 1. Clinical Factors Affecting CMV Reactivation</b>                                                                                                                                                                    |                              |                |
|---------------------------------------------------------------------------------------------------------------------------------------------------------------------------------------------------------------------------------------------|------------------------------|----------------|
| <b>Clinical Factor</b>                                                                                                                                                                                                                      | <b>Hazard Ratio (95% CI)</b> | <b>P value</b> |
| <b>Univariate Analysis</b>                                                                                                                                                                                                                  |                              |                |
| <b>Age</b>                                                                                                                                                                                                                                  |                              |                |
| ≥ 50 versus < 50 years                                                                                                                                                                                                                      | 0.3 (0.1-0.9)                | .04            |
| ≥ 60 versus < 60 years                                                                                                                                                                                                                      | 0.7 (0.2-2.2)                | .57            |
| ≥ 70 versus < 70 years                                                                                                                                                                                                                      | 1.3 (0.4-4.1)                | .68            |
| <b>CMV serostatus</b> (positive versus negative)                                                                                                                                                                                            | 13.8 (2.9-65.3)              | <.001          |
| <b>Number of lines of lymphoma therapy</b>                                                                                                                                                                                                  |                              |                |
| ≥ 3 versus < 3                                                                                                                                                                                                                              | 2.1 (0.3-15.1)               | .45            |
| ≥ 4 versus < 4                                                                                                                                                                                                                              | 0.4 (0.2-1.3)                | .14            |
| ≥ 5 versus < 5                                                                                                                                                                                                                              | 0.4 (0.1-3.3)                | .42            |
| <b>KPS</b> (< 80 versus 80)                                                                                                                                                                                                                 | 4.3 (0.5-36)                 | .18            |
| <b>Lymphodepletion regimen</b><br>(fludarabine/cyclophosphamide versus bendamustine)                                                                                                                                                        | 1.9 (0.4-8.8)                | .40            |
| <b>CAR T cell product</b> (standard of care axicabtagene ciloleucel versus other)                                                                                                                                                           | 2.1 (0.7-6.4)                | .18            |
| <b>Development of ICANS by grade</b>                                                                                                                                                                                                        |                              |                |
| ≥ 1 versus < 1                                                                                                                                                                                                                              | 1.3 (0.7 – 2.5)              | .38            |
| ≥ 2 versus < 2                                                                                                                                                                                                                              | 1.4 (0.5-3.7)                | .47            |
| ≥ 3 versus < 3                                                                                                                                                                                                                              | 1.0 (.3-3.1)                 | .97            |
| <b>Development of CRS by grade</b>                                                                                                                                                                                                          |                              |                |
| ≥ 1 versus < 1                                                                                                                                                                                                                              | 1.1 (0.5-2.5)                | .84            |
| ≥ 2 versus < 2                                                                                                                                                                                                                              | 0.6 (0.2-1.7)                | .36            |
| <b>Multivariate analysis</b>                                                                                                                                                                                                                |                              |                |
| <b>Age</b> (≥ 50 versus < 50 years)                                                                                                                                                                                                         | 0.2 (0.1-0.4)                | <.001          |
| <b>CMV serostatus</b> (positive versus negative)                                                                                                                                                                                            | 18.5 (4.5-76.6)              | <.001          |
| <b>Abbreviations:</b> CAR – chimeric antigen receptor, CI – confidence interval, CMV – cytomegalovirus, CRS – cytokine release syndrome, ICANS – immune effector cell associated neurotoxicity syndrome, KPS – Karnofsky performance status |                              |                |

| <b>Supplemental Table 2. Mortality after CD19 CAR T Cell Therapy in Relation to CMV Reactivation</b> |                                        |                                                |                                             |
|------------------------------------------------------------------------------------------------------|----------------------------------------|------------------------------------------------|---------------------------------------------|
| <b>Status / Cause of Death</b>                                                                       | <b>All Subjects<br/>N=65<br/>N (%)</b> | <b>No CMV Reactivation*<br/>N=51<br/>N (%)</b> | <b>CMV Reactivation*<br/>N=14<br/>N (%)</b> |
| <b>Alive</b>                                                                                         | 33 (51)                                | 32 (63)                                        | 1 (7)]                                      |
| <b>Dead</b>                                                                                          | 32 (49)                                | 19 (37)                                        | 13 (93)                                     |
| Relapsed / refractory NHL                                                                            | 20 (63)                                | 11 (58)                                        | 9 (69)                                      |
| Infection                                                                                            | 4 (13)                                 | 2 (11)                                         | 2 (15)                                      |
| ICANS                                                                                                | 3 (9)                                  | 3 (16)                                         | 0 (0)                                       |
| Second cancer                                                                                        | 2 (6)                                  | 1 (5)                                          | 1 (8)                                       |
| Hemorrhage                                                                                           | 1 (3)                                  | 0 (0)                                          | 1 (8)                                       |
| Infection / hemorrhage                                                                               | 1 (3)                                  | 1 (5)                                          | 0 (0)                                       |
| Unknown                                                                                              | 1 (3)                                  | 1 (5)                                          | 0 (0)                                       |

**Notes:** Percentage of causes of death is of total dead subjects. Percentage of dead and alive subjects is of all subjects studied. **Abbreviations:** CAR – chimeric antigen receptor, CMV – cytomegalovirus, ICANS – immune effector cell associated neurotoxicity syndrome, NHL – non-Hodgkin lymphoma, \* CMV reactivation defined as CMV DNA qPCR >400 IU/mL

**Supplemental Figure 1. Classification tree for survival outcomes.** The entire dataset (N=65) was repeatedly split according to pre and post CAR T cell therapy factors to determine the best combination for classifying patients into groups that correlated with survival. The tree is composed of multiple splits which classify the patients into distinct groups (nodes, rounded boxes). Each node shows the number of patients in the node (2<sup>nd</sup> row) and the proportion of patients in the node that died (1<sup>st</sup> row). Each split shows the pre- or post-infusion factor used to dichotomize patients. Patients meeting the criteria flow to the left and patients not meeting the criteria flow to the right. Patients who reactivated CMV (node 1) had the highest probability of death (0.93). The causes of death were disease (N=9), hemorrhage (N=1), infection (N=2), second cancer (N=1). Patients who did not reactivate CMV but received  $\geq 4$  prior lymphoma therapies and developed ICANS (node 2) also had a high probability of death (0.91). The causes of death were ICANS (N=3), disease (N=3), unknown (N=1), infection (N=2), and infection / hemorrhage (N=1). Patients who did not reactivate CMV and received  $< 4$  prior lymphoma therapies (node 3) had the lowest probability of death (0.18).

**Abbreviations:** CAR – chimeric antigen receptor, CMV – cytomegalovirus, ICANS – immune effector cell associated neurotoxicity syndrome.

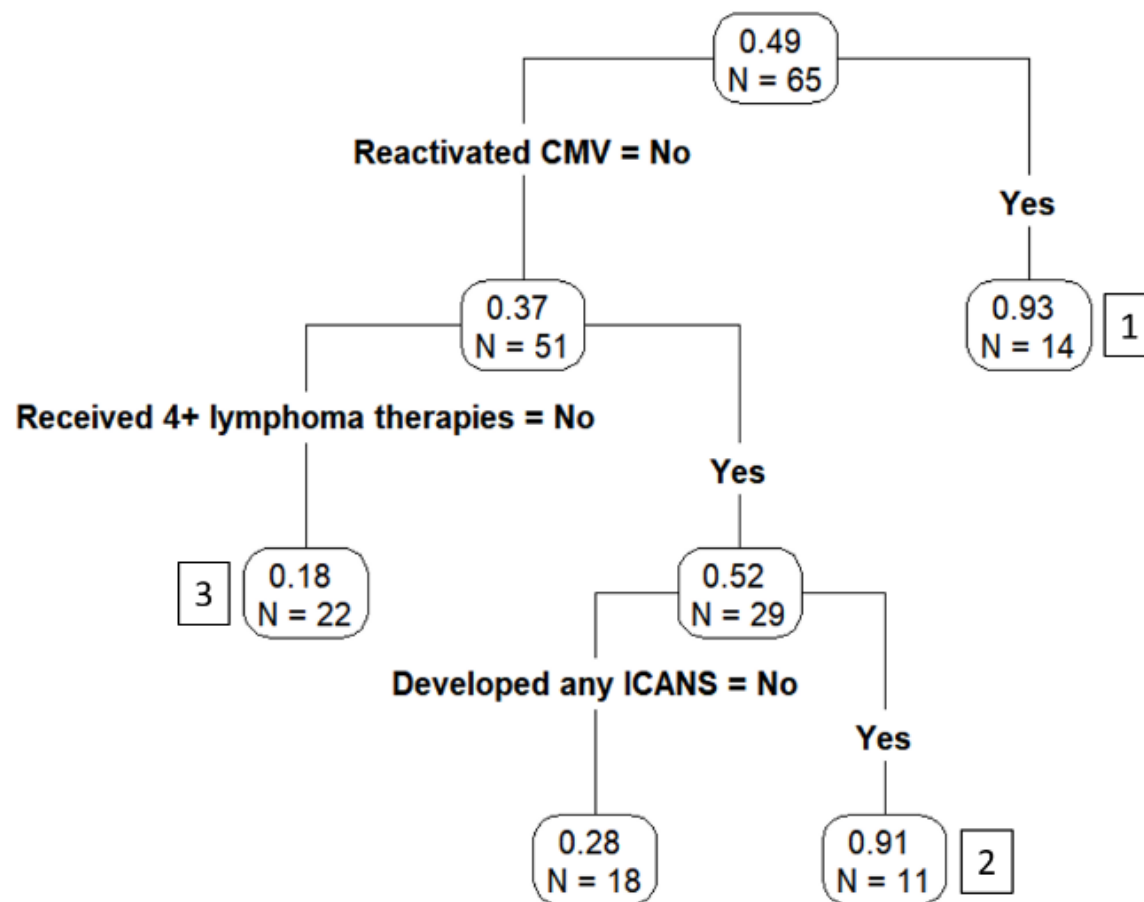

Supplemental Figure 1.
